# Supplementary material for: Aligned collagen scaffold combination with human spinal cord-derived neural stem cells to improve spinal cord injury repair
Source: Royal Society of Chemistry journal article supplement (doi:10.1039/d0bm00431f), 2020-01-01
Supplement: d0bm00431f2.pdf [file d0bm00431f2.pdf]

### **Supplementary Material**

**Title:** Aligned Collagen Scaffold Combination with Human Spinal Cord-derived Neural Stem Cells to Improve Spinal Cord Injury Repair

**Authors:** Yunlong Zou<sup>a,b,#</sup>, Dezun Ma<sup>b,#</sup>, He Shen<sup>b,c,#</sup>, Yannan Zhao<sup>b</sup>, Bai Xu<sup>b</sup>, Yongheng Fan<sup>b</sup>, Zheng Sun<sup>b</sup>, Bing Chen<sup>b</sup>, Weiwei Xue<sup>b</sup>, Ya Shi<sup>b</sup>, Zhifeng Xiao<sup>b,\*</sup>, Rui Gu<sup>a,\*</sup> and Jianwu Dai<sup>b,c,\*</sup>

<sup>a</sup> China-Japan Union Hospital of Jilin University, 126 Xiantai Street, Changchun 130033, China

<sup>b</sup> State Key Laboratory of Molecular Developmental Biology, Institute of Genetics and Developmental Biology, Chinese Academy of Sciences, 3 Nanyitiao, Zhongguancun, Beijing 100101, China

<sup>c</sup> Key Laboratory for Nano-Bio Interface Research, Division of Nanobiomedicine, Suzhou Institute of Nano-Tech and Nano-Bionics, Chinese Academy of Sciences, Suzhou 215123, China

<sup>#</sup> These authors contribute equally to this work.

\*Corresponding authors. Email addresses: [jwdai@genetics.ac.cn](mailto:jwdai@genetics.ac.cn) (J. D); [cggurui@hotmail.com](mailto:cggurui@hotmail.com) (R. G); [zfxiao@genetics.ac.cn](mailto:zfxiao@genetics.ac.cn) (Z. X).

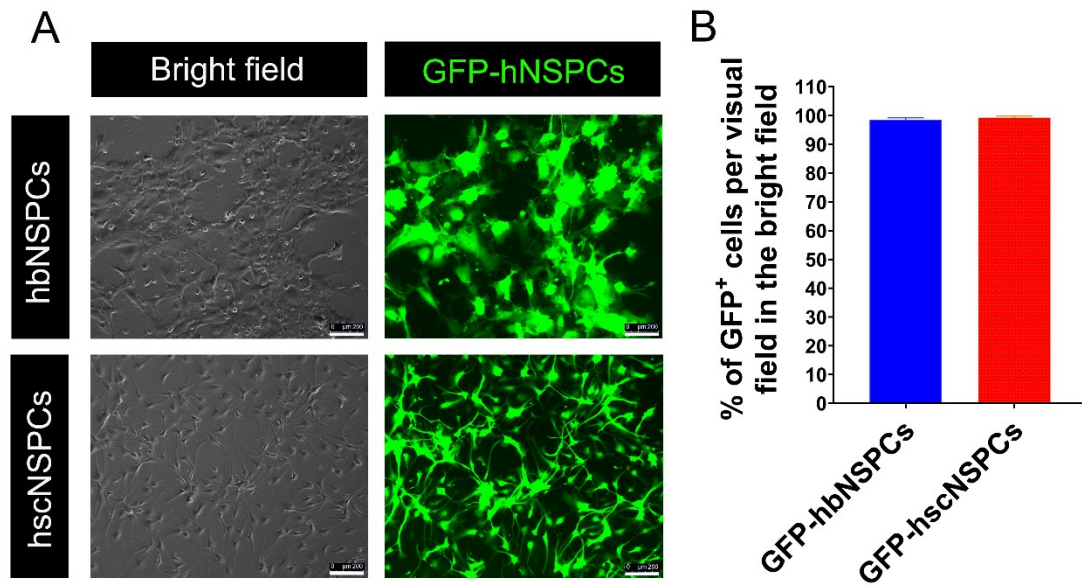

**Figure S1. Transplanted hNSPCs infected with lentivirus expressing GFP *in vitro*.**

**(A)** Images of hbNSPCs and hscNSPCs infected with lentivirus expressing GFP. Scale bars: 200  $\mu$ m. **(B)** Infection efficiency of hbNSPCs and hscNSPCs before transplantation ( $P > 0.05$ ).

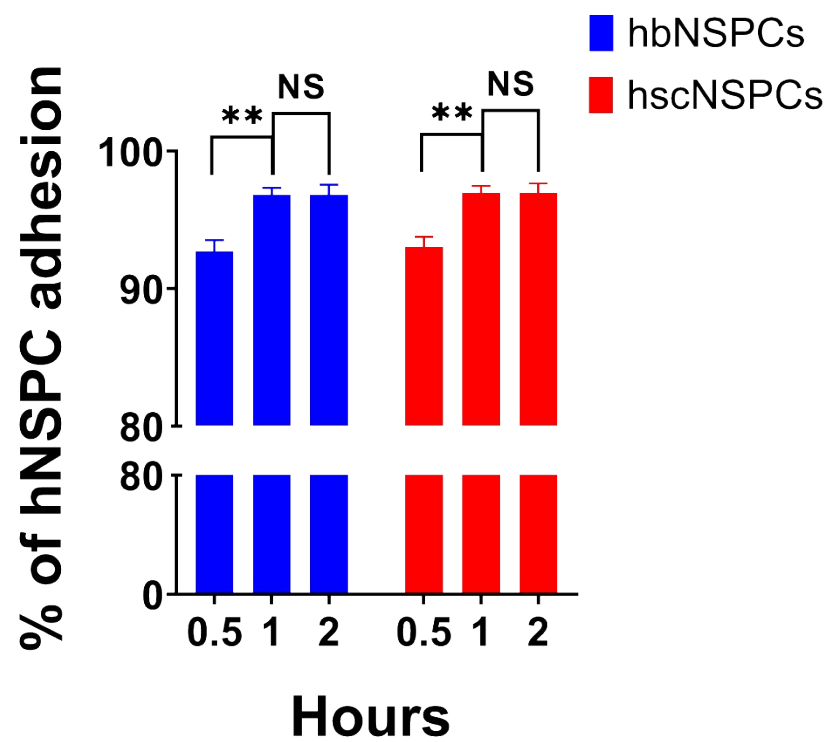

**Figure S2. Cell attachment behavior.** Most hNSPCs attached to the ACSSs after 1 hour of incubation.

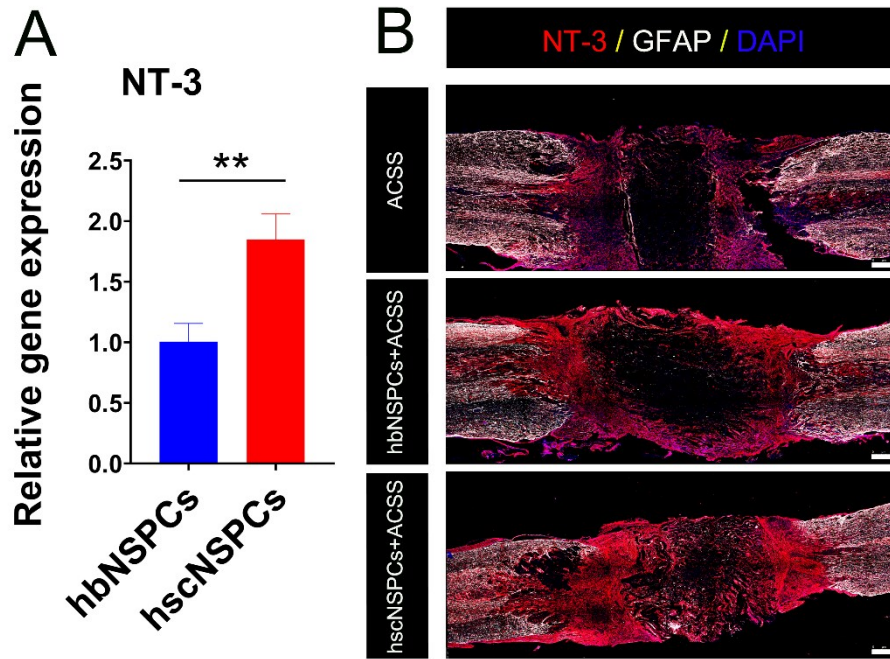

**Figure S3. Secretion of neurotrophin-3 in the lesion area. (A)** qPCR of relative gene expression of NT-3 in hbNSPCs and hscNSPCs *in vitro*. **\*\*** $P < 0.01$ . **(B)** Immunofluorescence staining of NT-3 in the injury microenvironment *in vivo*. Scale bars: 250  $\mu\text{m}$ .

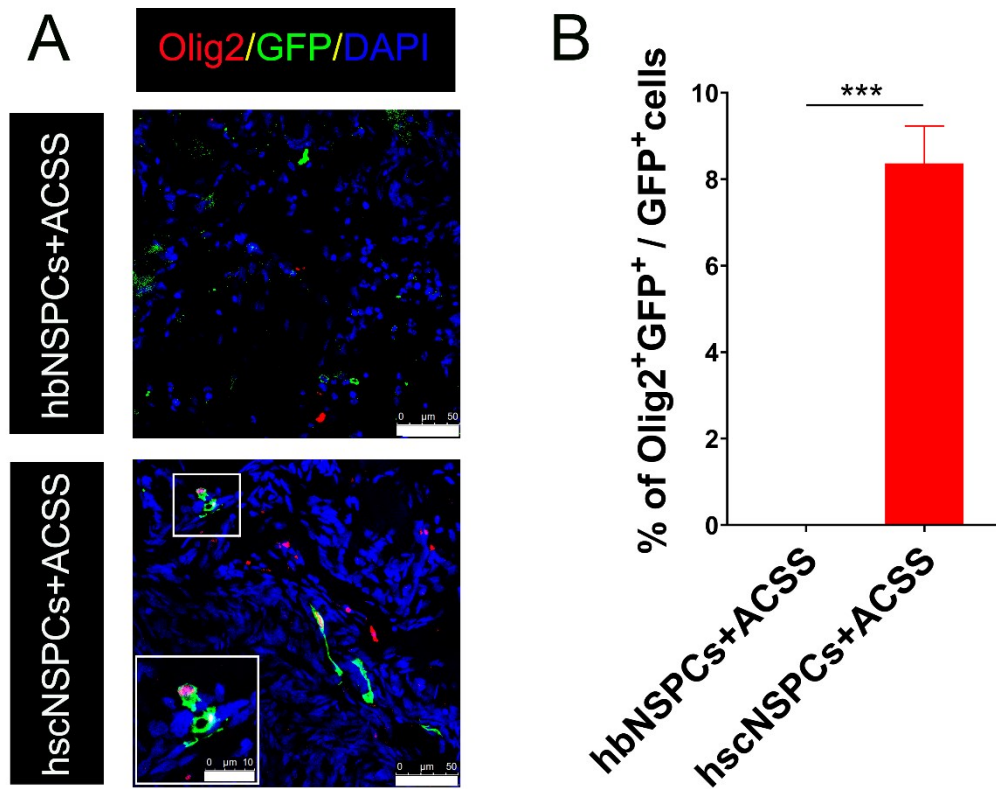

**Figure S4. Oligodendrocyte differentiation at the injury site 8 weeks after transplantation.** (A) Representative immunofluorescence profiles for Olig2 (red, for oligodendrocytes) at the center of the injury site in the hbNSPCs + ACSS and hscNSPCs + ACSS groups. Scale bars: 50  $\mu$ m (Scale bars of the inserts = 10  $\mu$ m). (B) Percentage of Olig2-positive cells differentiated from implanted hbNSPCs and hscNSPCs. \*\*\* $P < 0.001$ .

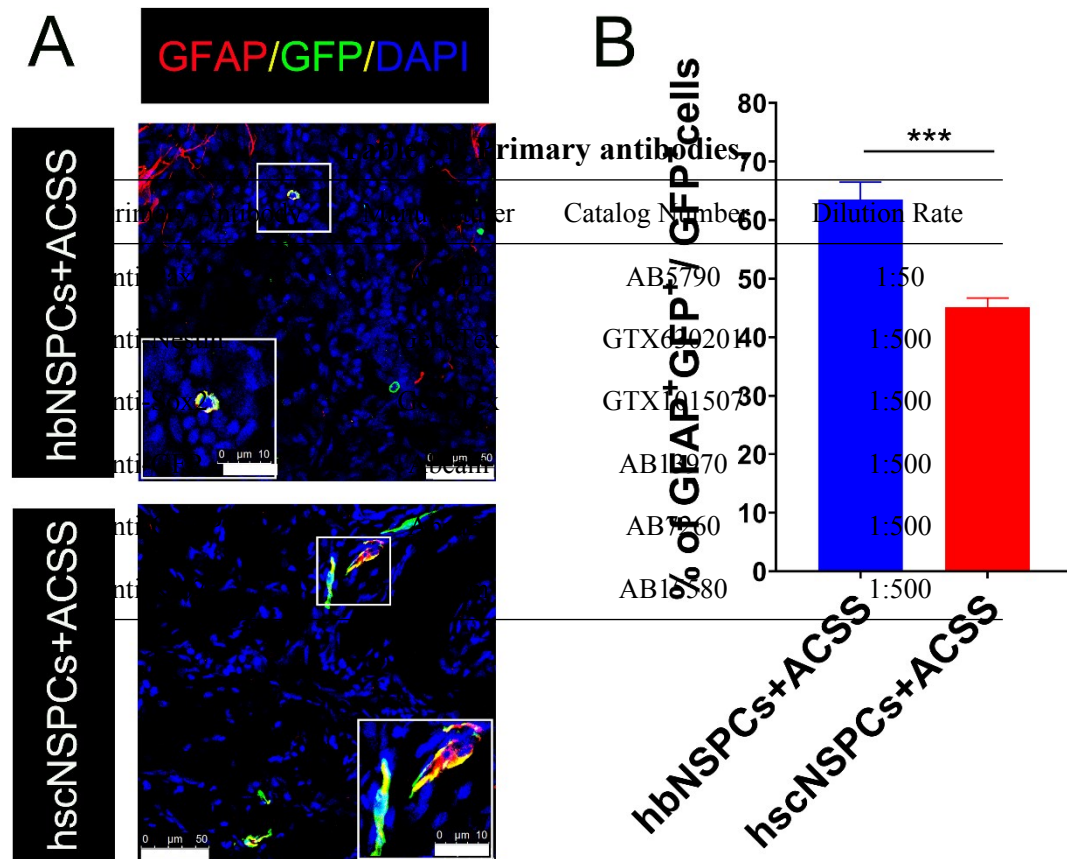

**Figure S5. Astrocyte differentiation at the site of injury 8 weeks after transplantation. (A)** Representative immunofluorescence profiles for GFAP (red, for astrocytes) at the center of the injury site. Scale bars: 50  $\mu\text{m}$  (Scale bars of the inserts = 10  $\mu\text{m}$ ). **(B)** Percentage of GFAP-positive cells differentiated from implanted hNSPCs. \*\*\* $P < 0.001$ .

|                   |            |          |       |
|-------------------|------------|----------|-------|
| anti-Caspase3     | R&D        | AF835    | 1:500 |
| anti-Tuj-1        | Abcam      | AB18207  | 1:500 |
| anti-Map2         | Abcam      | AB11267  | 1:500 |
| anti-5-HT         | ImmunoStar | 20080    | 1:500 |
| anti-ChAT         | Abcam      | AB144P   | 1:500 |
| anti-MBP          | Covance    | SMI-99P  | 1:400 |
| anti-SYN          | Abcam      | AB64581  | 1:100 |
| anti-NF           | Abcam      | AB8135   | 1:300 |
| anti-CD-68        | Abcam      | AB125212 | 1:500 |
| anti-IL-1 $\beta$ | Abcam      | AB9722   | 1:500 |
| anti-CS-56        | Sigma      | C8035    | 1:500 |
| anti-NT-3         | Abcam      | AB16640  | 1:500 |

**Movie S1**

Movie of motor function of rats in the four experimental groups.
